# Supplementary material for: GCN5 Regulates FGF Signaling and Activates Selective MYC Target Genes during Early Embryoid Body Differentiation
Source: PubMed Central journal article supplement — Stem Cell Reports. 2017 Dec 14;10(1):287–99. doi: 10.1016/j.stemcr.2017.11.009 (PMC5768892; doi:10.1016/j.stemcr.2017.11.009), 2017-12-14
Supplement: mmc1.pdf [file mmc1.pdf]

**Stem Cell Reports, Volume 10**

**Supplemental Information**

**GCN5 Regulates FGF Signaling and Activates Selective MYC Target  
Genes during Early Embryoid Body Differentiation**

**Li Wang, Evangelia Koutelou, Calley Hirsch, Ryan McCarthy, Andria Schibler, Kevin  
Lin, Yue Lu, Collene Jeter, Jianjun Shen, Michelle C. Barton, and Sharon Y.R. Dent**

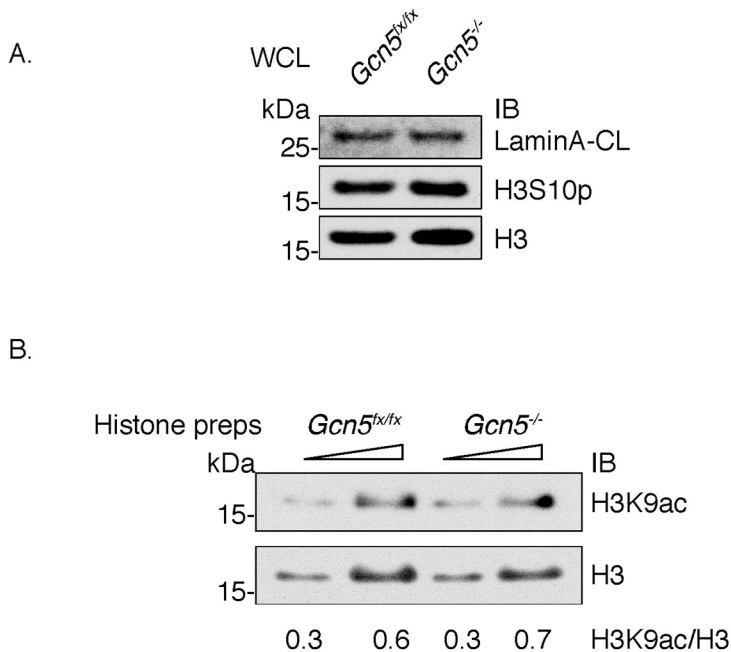

**Figure S1 Loss of *Gcn5* does not cause overt defect in proliferation or apoptosis. Related to Figure 1**

(A) Immunoblots of mitotic marker (H3S10p) and apoptosis marker (cleaved-LaminA) showed no differences between *Gcn5<sup>lox/lox</sup>* and *Gcn5<sup>-/-</sup>* EBs at day 5. WCL, whole cell lysates.

(B) Immunoblot of H3K9ac in day 5 EBs demonstrated no global changes upon loss of *Gcn5* at early stage of differentiation.

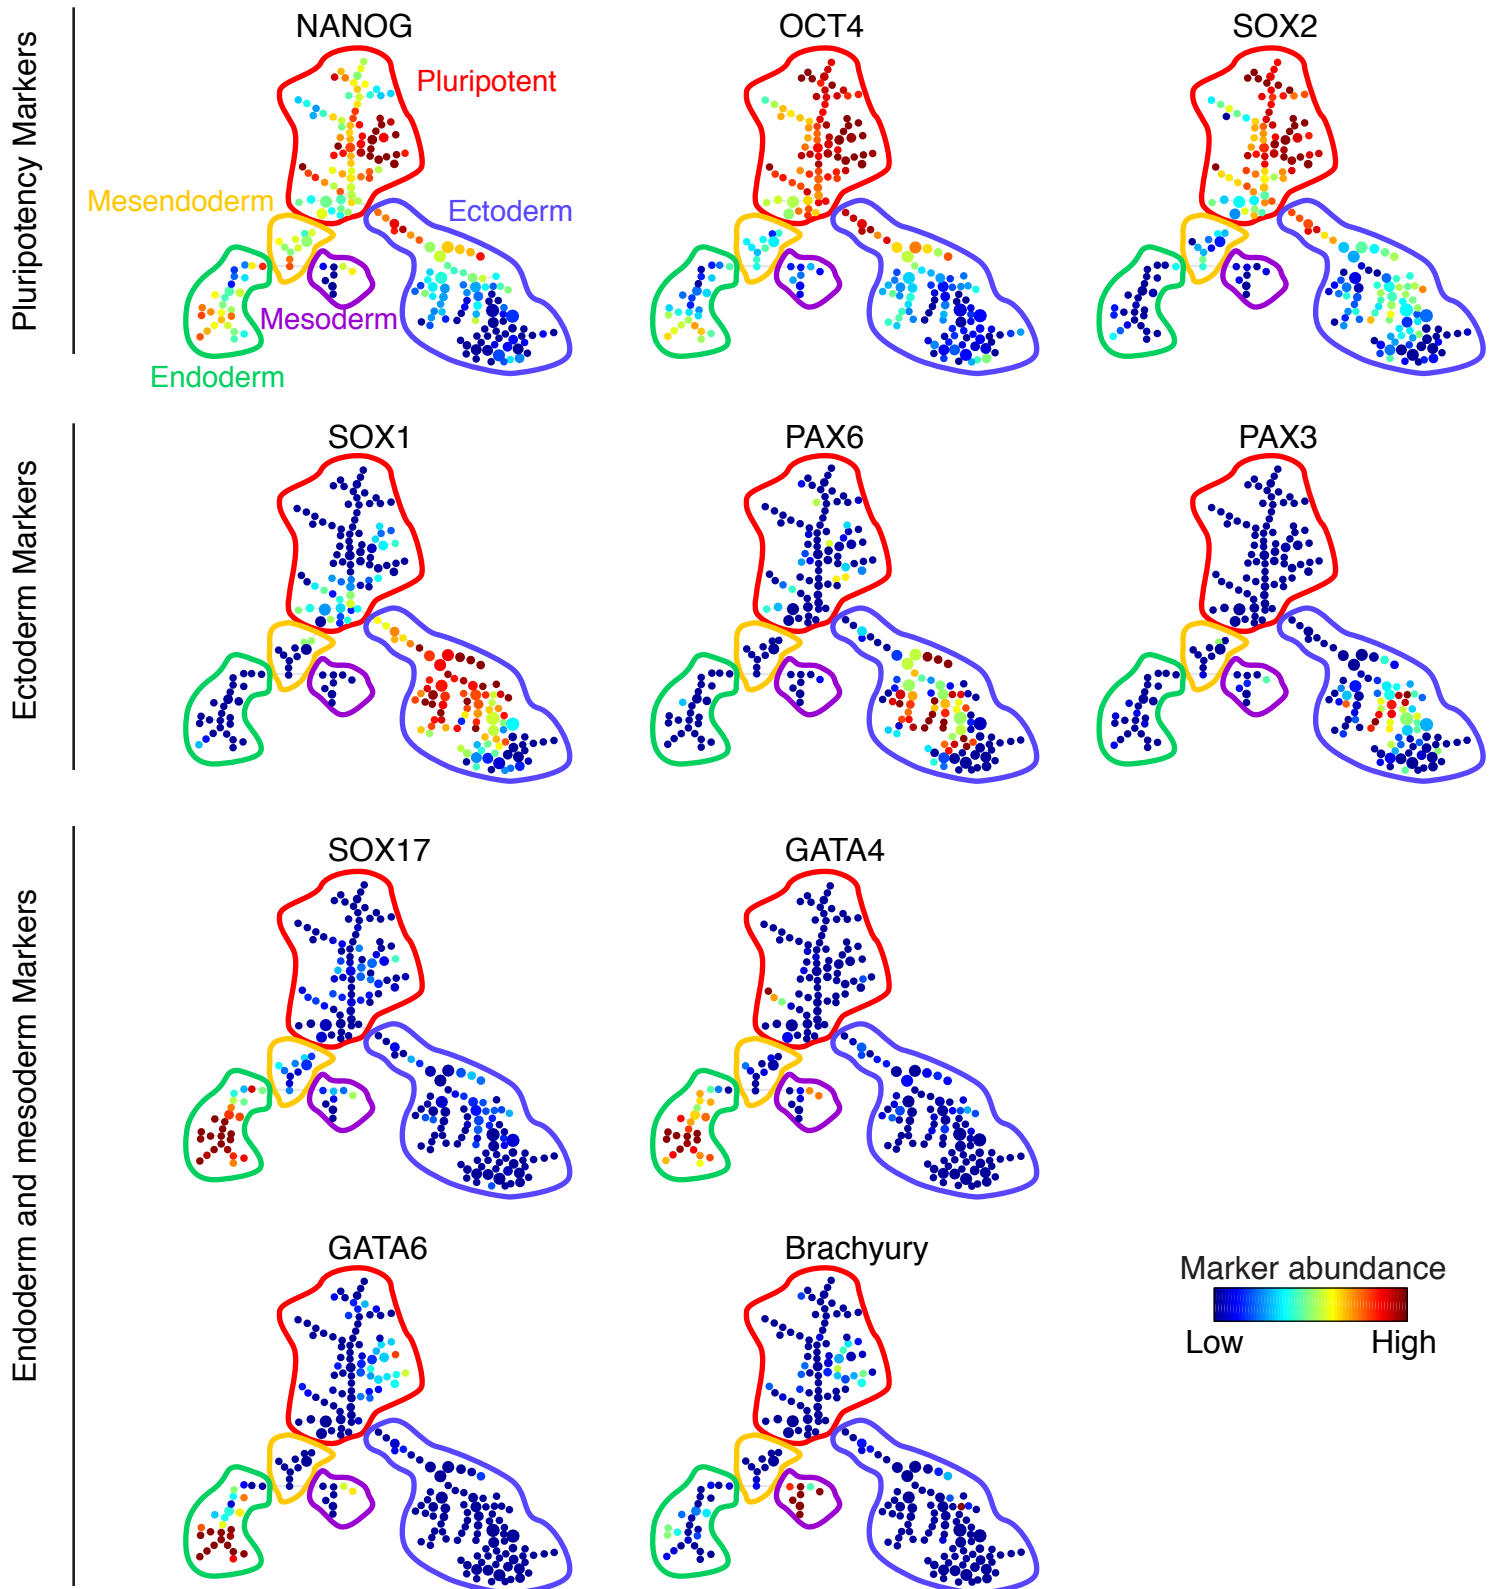

**Figure S2 Mass cytometry to delineate heterogeneous cell populations during ESC differentiation. Related to Figure 2.**

Proof-of-principle experiment showing lineage markers are enriched for corresponding cell populations. Upper panels: ES cells, NANOG, OCT4, and SOX2 enriched in the pluripotent region defined in red. Middle panels: differentiated EBs, SOX1, PAX6 and PAX3 enriched in the ectoderm region (blue). Lower panels: differentiated EBs, SOX17, GATA4, GATA6 enriched for the endoderm region (green) and Brachyury enriched in the mesoderm region (purple).

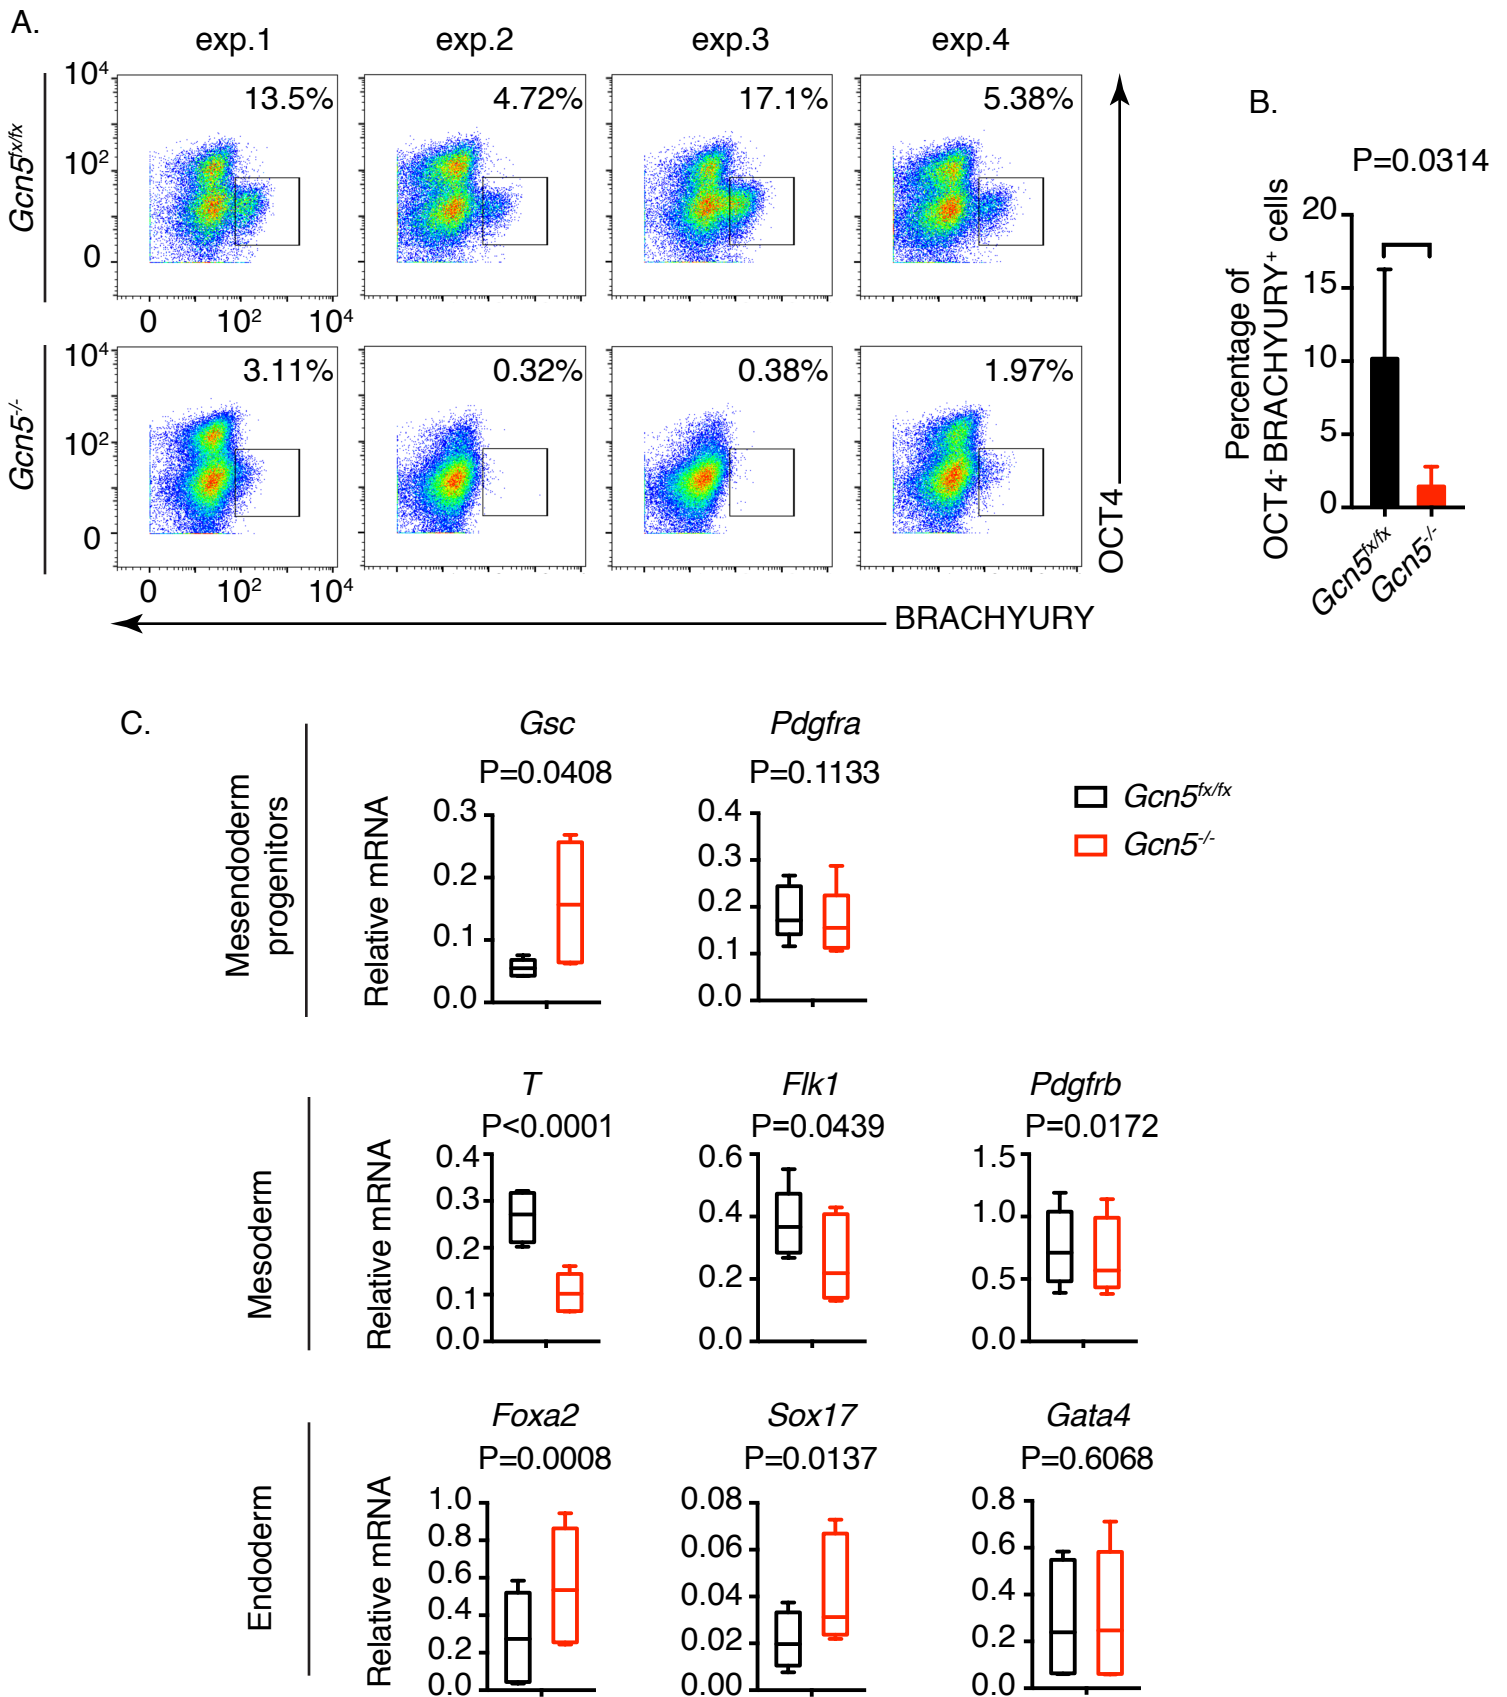

**Figure S3 Loss of *Gcn5* impedes mesoderm differentiation. Related to Figure 2**

(A) Gated mesoderm population of day 5 EBs from 4 independent mass cytometry experiments.

(B) Quantification of (A).

(C) qRT-PCR analysis of marker genes for indicated populations derived from monolayer mesoderm/endoderm differentiation of control and *Gcn5*<sup>-/-</sup> ES cells (n=3).

Data are presented as Mean ± SD, and student t-test was used for pair-wise comparisons.

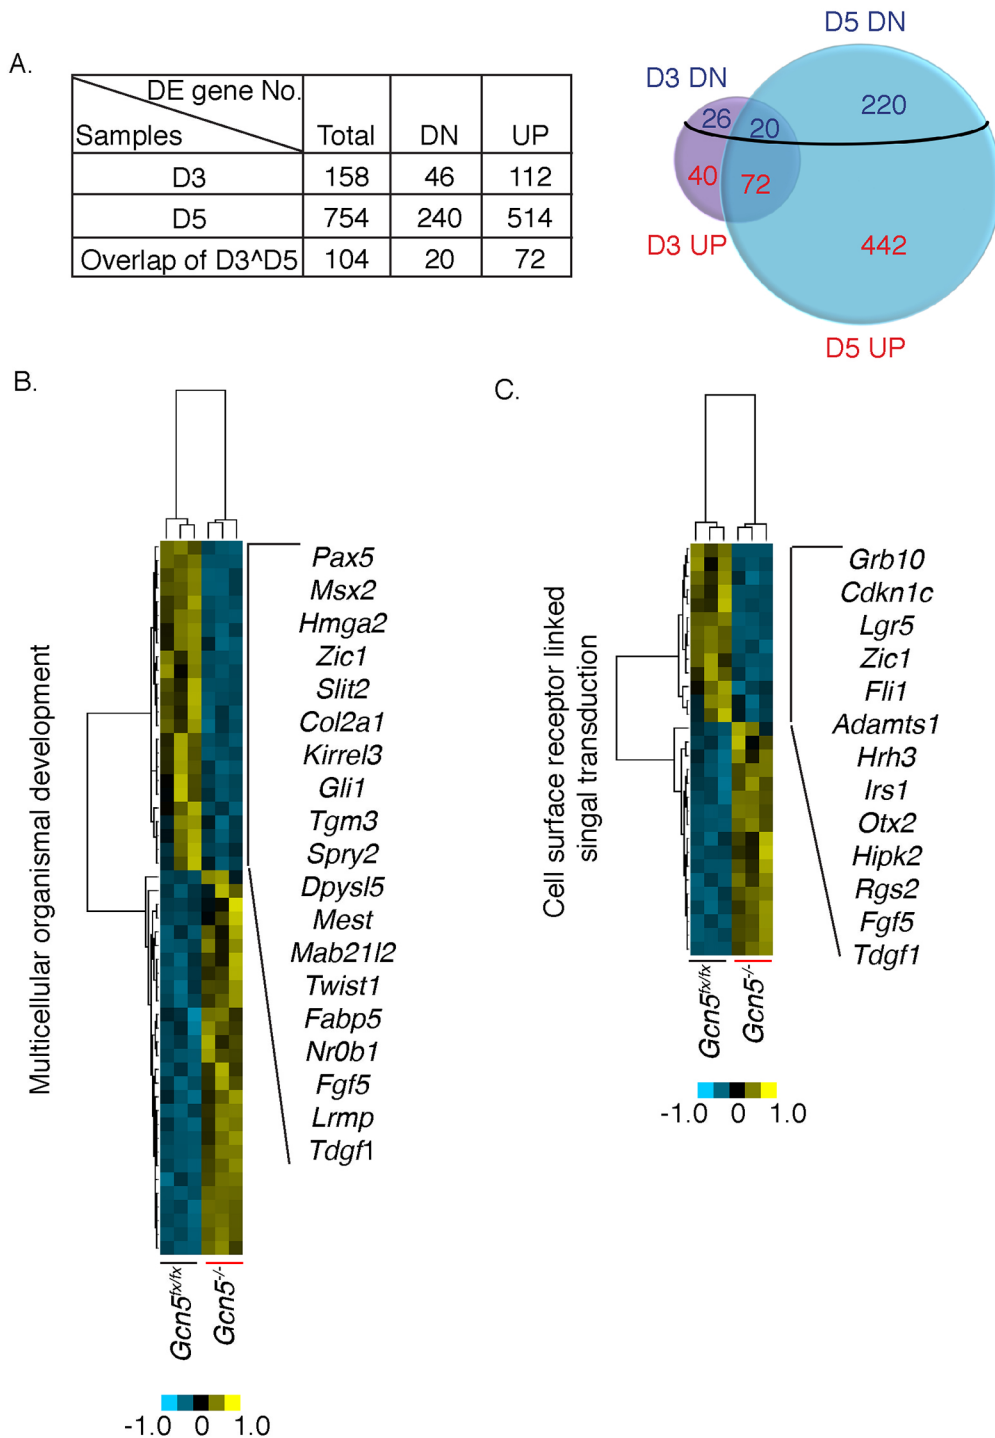

**Figure S4 Loss of *Gcn5* impacted genes critical for development and signaling. Related to Figure 3**

(A) Break down of the numbers of genes altered upon *Gcn5* loss in day 5 EBs.

(B and C) Heatmaps showing the top enriched genes in MOD (B) and CSRLST (C).

Color bars, normalized RPKM counts (False discovery rate 0.05, Fold change  $\geq 2$ )

**Table S1 Lineage markers used for mass cytometry. Related to Figure 2**

| <b>Antibodies</b>  | <b>Expression</b> | <b>Isotope Label</b> |
|--------------------|-------------------|----------------------|
| Anti-NANOG         | Pluripotency      | 163Dy                |
| Anti-OCT4          | Pluripotency      | 146Nd                |
| Anti-SOX2          | Pluripotency      | 147Sm                |
| Anti-SOX1          | Ectoderm          | 176Yb                |
| Anti-PAX3          | Ectoderm          | 170Er                |
| Anti-PAX6          | Ectoderm          | 153Eu                |
| Anti-FOXA2         | Endoderm          | 150Nd                |
| Anti-GATA6         | Endoderm          | 142Nd                |
| Anti-GATA4         | Endoderm          | 171Yb                |
| Anti-SOX17         | Endoderm          | 175Lu                |
| Anti-Brachyury (T) | Mesoderm          | 156Gd                |
| Anti-HAND1         | Mesoderm          | 158Gd                |

**Table S2 List of genes enriched in the Multicellular Organismal Development category identified by GSEA. Related to Figure 3**

| NAME   | PROBE    | GENE SYMBOL | GENE_TITLE                                                                                    | RANK IN GENE LIST | RANK METRIC SCORE | RUNNING ES  | CORE ENRICHMENT |
|--------|----------|-------------|-----------------------------------------------------------------------------------------------|-------------------|-------------------|-------------|-----------------|
| row_0  | PAX5     | PAX5        | paired box gene 5 (B-cell lineage specific activator)                                         | 2                 | 3.143970966       | 0.026952207 | Yes             |
| row_1  | MSX2     | MSX2        | msh homeobox homolog 2 (Drosophila)                                                           | 6                 | 2.793720722       | 0.048327506 | Yes             |
| row_2  | HMGA2    | HMGA2       | high mobility group AT-hook 2                                                                 | 10                | 2.60679245        | 0.067849986 | Yes             |
| row_3  | ZIC1     | ZIC1        | Zic family member 1 (odd-paired homolog, Drosophila)                                          | 13                | 2.445233583       | 0.08787638  | Yes             |
| row_4  | SLIT2    | SLIT2       | slit homolog 2 (Drosophila)                                                                   | 14                | 2.438150406       | 0.11204308  | Yes             |
| row_5  | COL2A1   | COL2A1      | collagen, type II, alpha 1 (primary osteoarthritis, spondyloepiphyseal dysplasia, congenital) | 20                | 2.313369513       | 0.12444666  | Yes             |
| row_6  | KIRREL3  | KIRREL3     | kin of IRRE like 3 (Drosophila)                                                               | 23                | 2.268698215       | 0.14272325  | Yes             |
| row_7  | GLI1     | GLI1        | glioma-associated oncogene homolog 1 (zinc finger protein)                                    | 25                | 2.187872887       | 0.16230397  | Yes             |
| row_8  | TGM3     | TGM3        | transglutaminase 3 (E polypeptide, protein-glutamine-gamma-glutamyltransferase)               | 27                | 2.169377327       | 0.18170136  | Yes             |
| row_9  | SPRY2    | SPRY2       | sprouty homolog 2 (Drosophila)                                                                | 31                | 2.100628138       | 0.1962068   | Yes             |
| row_10 | DPYSL5   | DPYSL5      | dihydropyrimidinase-like 5                                                                    | 33                | 2.077706337       | 0.21469556  | Yes             |
| row_11 | MEST     | MEST        | mesoderm specific transcript homolog (mouse)                                                  | 44                | 1.956736565       | 0.21303791  | Yes             |
| row_12 | MAB21L2  | MAB21L2     | mab-21-like 2 (C. elegans)                                                                    | 54                | 1.908952236       | 0.21301188  | Yes             |
| row_13 | TWIST1   | TWIST1      | twist homolog 1 (acrocephalosyndactyly 3; Saethre-Chotzen syndrome) (Drosophila)              | 55                | 1.892674208       | 0.23177189  | Yes             |
| row_14 | FABP5    | FABP5       | fatty acid binding protein 5 (psoriasis-associated)                                           | 57                | 1.876633048       | 0.24826762  | Yes             |
| row_15 | OTX2     | OTX2        | orthodenticle homolog 2 (Drosophila)                                                          | 74                | 1.794868827       | 0.23237398  | No              |
| row_16 | PTCH2    | PTCH2       | patched homolog 2 (Drosophila)                                                                | 81                | 1.774591208       | 0.23733197  | No              |
| row_17 | NDP      | NDP         | Norrie disease (pseudoglioma)                                                                 | 101               | 1.670649171       | 0.21389128  | No              |
| row_18 | FGF17    | FGF17       | fibroblast growth factor 17                                                                   | 117               | 1.568956375       | 0.19786368  | No              |
| row_19 | EPHA2    | EPHA2       | EPH receptor A2                                                                               | 127               | 1.409094691       | 0.19288312  | No              |
| row_20 | NR0B1    | NR0B1       | nuclear receptor subfamily 0, group B, member 1                                               | 134               | 1.361806631       | 0.19374964  | No              |
| row_21 | FGF5     | FGF5        | fibroblast growth factor 5                                                                    | 160               | 1.005194783       | 0.15108146  | No              |
| row_22 | LRMP     | LRMP        | lymphoid-restricted membrane protein                                                          | 162               | 1.003890395       | 0.15892665  | No              |
| row_23 | TDGF1    | TDGF1       | teratocarcinoma-derived growth factor 1                                                       | 166               | 0.946586847       | 0.16199334  | No              |
| row_24 | ALOX12B  | ALOX12B     | arachidonate 12-lipoxygenase, 12R type                                                        | 174               | -1.041075826      | 0.15757555  | No              |
| row_25 | TRIM14   | TRIM14      | tripartite motif-containing 14                                                                | 181               | -1.18687892       | 0.1567082   | No              |
| row_26 | ANXA2    | ANXA2       | annexin A2                                                                                    | 198               | -1.373691678      | 0.13663988  | No              |
| row_27 | SGCD     | SGCD        | sarcoglycan, delta (35kDa dystrophin-associated glycoprotein)                                 | 201               | -1.397668123      | 0.1462829   | No              |
| row_28 | ETS1     | ETS1        | v-ets erythroblastosis virus E26 oncogene homolog 1 (avian)                                   | 217               | -1.476131439      | 0.12933522  | No              |
| row_29 | ERG      | ERG         | v-ets erythroblastosis virus E26 oncogene homolog (avian)                                     | 222               | -1.50989151       | 0.13588007  | No              |
| row_30 | RAPGEFL1 | RAPGEFL1    | Rap guanine nucleotide exchange factor (GEF)-like 1                                           | 227               | -1.535297155      | 0.14267674  | No              |
| row_31 | IGFBP3   | IGFBP3      | insulin-like growth factor binding protein 3                                                  | 249               | -1.666120291      | 0.11498063  | No              |
| row_32 | SGCE     | SGCE        | sarcoglycan, epsilon                                                                          | 251               | -1.675953865      | 0.12948726  | No              |

|        |         |         |                                                                                      |     |              |             |    |
|--------|---------|---------|--------------------------------------------------------------------------------------|-----|--------------|-------------|----|
| row_33 | JAG2    | JAG2    | jagged 2                                                                             | 253 | -1.683297992 | 0.14406668  | No |
| row_34 | SGCG    | SGCG    | sarcoglycan, gamma (35kDa dystrophin-associated glycoprotein)                        | 282 | -1.763670683 | 0.10260065  | No |
| row_35 | MYH3    | MYH3    | myosin, heavy chain 3, skeletal muscle, embryonic                                    | 290 | -1.779546738 | 0.10550249  | No |
| row_36 | IGFBP4  | IGFBP4  | insulin-like growth factor binding protein 4                                         | 301 | -1.796701074 | 0.10225859  | No |
| row_37 | CACNA1H | CACNA1H | calcium channel, voltage-dependent, alpha 1H subunit                                 | 311 | -1.824573159 | 0.10139622  | No |
| row_38 | SHOX2   | SHOX2   | short stature homeobox 2                                                             | 315 | -1.830768824 | 0.11322682  | No |
| row_39 | AEBP1   | AEBP1   | AE binding protein 1                                                                 | 340 | -1.907915235 | 0.08161158  | No |
| row_40 | RASGRP4 | RASGRP4 | RAS guanyl releasing protein 4                                                       | 376 | -2.075456142 | 0.028499093 | No |
| row_41 | NEUROG3 | NEUROG3 | neurogenin 3                                                                         | 385 | -2.098732948 | 0.032459423 | No |
| row_42 | FGF11   | FGF11   | fibroblast growth factor 11                                                          | 389 | -2.107631922 | 0.04703428  | No |
| row_43 | ALDH3A2 | ALDH3A2 | aldehyde dehydrogenase 3 family, member A2                                           | 397 | -2.13826108  | 0.05349167  | No |
| row_44 | MEF2C   | MEF2C   | MADS box transcription enhancer factor 2, polypeptide C (myocyte enhancer factor 2C) | 398 | -2.148215771 | 0.07478458  | No |
| row_45 | STAT3   | STAT3   | signal transducer and activator of transcription 3 (acute-phase response factor)     | 401 | -2.162971735 | 0.09201321  | No |
| row_46 | CRIM1   | CRIM1   | cysteine rich transmembrane BMP regulator 1 (chordin-like)                           | 429 | -2.307478189 | 0.05804261  | No |
| row_47 | NMUR2   | NMUR2   | neuromedin U receptor 2                                                              | 462 | -2.529047012 | 0.015741859 | No |
| row_48 | DMRT1   | DMRT1   | doublesex and mab-3 related transcription factor 1                                   | 474 | -2.65857625  | 0.01893551  | No |
| row_49 | EVPL    | EVPL    | envoplakin                                                                           | 485 | -2.816974878 | 0.02580446  | No |
| row_50 | GFRA3   | GFRA3   | GDNF family receptor alpha 3                                                         | 486 | -2.819857836 | 0.053754613 | No |
| row_51 | SNAI2   | SNAI2   | snail homolog 2 (Drosophila)                                                         | 492 | -2.860271454 | 0.07157903  | No |



**Table S3 List of genes enriched in the Cell Surface Receptor Linked Signal Transduction category identified by GSEA. Related to Figure 3.**

| NAME   | PROBE    | GENE SYMBOL | GENE_TITLE                                                  | RANK IN GENE LIST | RANK METRIC SCORE | RUNNING ES   | CORE ENRICHMENT |
|--------|----------|-------------|-------------------------------------------------------------|-------------------|-------------------|--------------|-----------------|
| row_0  | GRB10    | GRB10       | growth factor receptor-bound protein 10                     | 0                 | 4.903269768       | 0.07419716   | Yes             |
| row_1  | CDKN1C   | CDKN1C      | cyclin-dependent kinase inhibitor 1C (p57, Kip2)            | 1                 | 3.456902027       | 0.12650761   | Yes             |
| row_2  | LGR5     | LGR5        | leucine-rich repeat-containing G protein-coupled receptor 5 | 11                | 2.555413246       | 0.14706793   | Yes             |
| row_3  | ZIC1     | ZIC1        | Zic family member 1 (odd-paired homolog, Drosophila)        | 13                | 2.445233583       | 0.18205757   | Yes             |
| row_4  | GLI1     | GLI1        | glioma-associated oncogene homolog 1 (zinc finger protein)  | 25                | 2.187872887       | 0.19303207   | Yes             |
| row_5  | ADAMTS1  | ADAMTS1     | ADAM metalloproteinase with thrombospondin type 1 motif, 1  | 36                | 2.065867424       | 0.20417242   | Yes             |
| row_6  | HRH3     | HRH3        | histamine receptor H3                                       | 37                | 2.059562922       | 0.23533809   | Yes             |
| row_7  | IRS1     | IRS1        | insulin receptor substrate 1                                | 53                | 1.913015485       | 0.2341051    | No              |
| row_8  | OTX2     | OTX2        | orthodenticle homolog 2 (Drosophila)                        | 74                | 1.794868827       | 0.22102393   | No              |
| row_9  | HIPK2    | HIPK2       | homeodomain interacting protein kinase 2                    | 106               | 1.659950376       | 0.18376835   | No              |
| row_10 | RGS2     | RGS2        | regulator of G-protein signalling 2, 24kDa                  | 115               | 1.601378202       | 0.19190411   | No              |
| row_11 | FGF5     | FGF5        | fibroblast growth factor 5                                  | 160               | 1.005194783       | 0.11858372   | No              |
| row_12 | TDGF1    | TDGF1       | teratocarcinoma-derived growth factor 1                     | 166               | 0.946586847       | 0.12284728   | No              |
| row_13 | STC1     | STC1        | stanniocalcin 1                                             | 186               | -1.224491358      | 0.10314713   | No              |
| row_14 | FLT4     | FLT4        | fms-related tyrosine kinase 4                               | 191               | -1.312462449      | 0.114959255  | No              |
| row_15 | RAPGEFL1 | RAPGEFL1    | Rap guanine nucleotide exchange factor (GEF)-like 1         | 227               | -1.535297155      | 0.06776911   | No              |
| row_16 | TBXA2R   | TBXA2R      | thromboxane A2 receptor                                     | 256               | -1.689142942      | 0.0369915    | No              |
| row_17 | RAMP1    | RAMP1       | receptor (calcitonin) activity modifying protein 1          | 285               | -1.764481425      | 0.007353922  | No              |
| row_18 | GPR20    | GPR20       | G protein-coupled receptor 20                               | 295               | -1.789713264      | 0.016327534  | No              |
| row_19 | IL13RA1  | IL13RA1     | interleukin 13 receptor, alpha 1                            | 356               | -1.987249494      | -0.07432539  | No              |
| row_20 | BDKRB2   | BDKRB2      | bradykinin receptor B2                                      | 360               | -2.004709721      | -0.050025985 | No              |
| row_21 | SOCS1    | SOCS1       | suppressor of cytokine signaling 1                          | 381               | -2.084973097      | -0.058717243 | No              |
| row_22 | OPRD1    | OPRD1       | opioid receptor, delta 1                                    | 394               | -2.121104479      | -0.05076518  | No              |
| row_23 | RASD1    | RASD1       | RAS, dexamethasone-induced 1                                | 439               | -2.354247332      | -0.10367147  | No              |
| row_24 | GABRA4   | GABRA4      | gamma-aminobutyric acid (GABA) A receptor, alpha 4          | 442               | -2.365311384      | -0.071903296 | No              |
| row_25 | NMUR2    | NMUR2       | neuromedin U receptor 2                                     | 462               | -2.529047012      | -0.07186268  | No              |
| row_26 | CD274    | CD274       | CD274 molecule                                              | 463               | -2.539172888      | -0.03343946  | No              |
| row_27 | LAT      | LAT         | linker for activation of T cells                            | 500               | -2.93972373       | -0.06138964  | No              |
| row_28 | IL12RB1  | IL12RB1     | interleukin 12 receptor, beta 1                             | 521               | -3.552495718      | -0.04787409  | No              |
| row_29 | CLEC1A   | CLEC1A      | C-type lectin domain family 1, member A                     | 524               | -3.695590973      | 0.004024112  | No              |

**Table S4 Top ranked transcription factors or regulators reported to bind genes with decreased H3K9ac identified in *Gcn5*<sup>-/-</sup> EBs at day 5. Related to Figure 5.**

| <b>Rank</b> | <b>TFs or regulators</b> | <b>Number of genes with H3K9ac decrease</b> | <b>Q-value</b> |
|-------------|--------------------------|---------------------------------------------|----------------|
| 1           | HCFC1                    | 205                                         | 1.25E-77       |
| 2           | MAX                      | 204                                         | 4.43E-72       |
| 3           | MXI1                     | 199                                         | 4.25E-66       |
| 4           | GCN5                     | 172                                         | 2.65E-61       |
| 5           | NELFE                    | 192                                         | 2.65E-61       |
| 6           | TBP                      | 192                                         | 1.69E-59       |
| 7           | CTCF                     | 210                                         | 3.77E-59       |
| 8           | SIN3A                    | 192                                         | 9.08E-59       |
| 9           | P300                     | 188                                         | 1.14E-58       |
| 10          | C-MYC                    | 164                                         | 2.44E-57       |
| 11          | E2F4                     | 99                                          | 1.40E-48       |
| 12          | ZNF                      | 145                                         | 1.69E-43       |
| 13          | POL2                     | 218                                         | 4.62E-43       |
| 14          | FLI1                     | 103                                         | 1.48E-42       |
| 15          | CHD2                     | 143                                         | 5.48E-35       |

## Supplemental Experimental Procedures

### Chromatin immunoprecipitation

The dissociated cells from day 5 EBs were cross-linked with 1% formaldehyde (Thermo Scientific™, PI28906) for 10 minutes at room temperature then quenched with 125 mM glycine for 5 minutes. The cells were washed with ice-cold PBS containing protease inhibitor cocktail (PI, Sigma, P8340), and then resuspended in swelling buffer (5 mM PIPES pH 8.0, 85 mM KCl and 1% NP40) containing PI for 20 minutes on ice. The nuclei were pelleted and lysed in nuclei lysis buffer (50 mM Tris-HCl pH 8.0, 10 mM EDTA and 1% SDS) and then sonicated using a Bioruptor® Plus sonication device (Diagenode B01020001). A total of 15 minutes of sonication (3 rounds of 10 cycles with 30 seconds on and 30 seconds off per cycle on the high setting) was applied to obtain chromatin fragments in the size of 150-300 bps. Sonicated samples were centrifuged to remove the insoluble debris. 30ug of chromatin fragments were diluted 1:10 in ChIP Dilution Buffer (0.01% SDS, 1% TritonX-100, 1mM EDTA, 20mM Tris-HCl, pH8.0 and 150mM NaCl) and were precleared with Dynabeads Protein A (Invitrogen™, 10002D) for 1 hour at 4°C. Precleared lysates were incubated with appropriate amount of antibodies (following manufacturer instructions) at 4°C overnight, followed by incubation with Dynabeads™ Protein A for 1 hour at 4°C. Immunoprecipitates were washed as previously described. All solutions used in the steps above were supplemented with PI. The DNA was eluted in elution buffer (50mM NaHCO<sub>3</sub> and 1% SDS) at room temperature for 15 minutes, de-crosslinked at 65°C overnight, treated with RNaseA for 1 hour at 37°C and purified using a PCR purification kit (Qiagen, 28104).

### ChIP library preparation

ChIP libraries were prepared using a Kapa Hyper Preparation kit (KAPA Biosystems, Wilmington, MA) protocol for Illumina Platforms. Briefly, for each library, 5ng of ChIP DNA was end-repaired and 3'-adenylated using a proprietary master mix, then ligated to the specific NextFlex adaptors from Bioo Scientific (Bioo Scientific, Austin, TX). The adaptor-ligated DNA was enriched using a KAPA Hyper Library Preparation kit (KAPA Biosystems, KK8502) with 5 cycles of PCR (1 cycle at 98°C for 45 seconds; 4 cycles of 98°C for 15 seconds, 60°C for 30 seconds, and 72°C for 30 seconds; 1 cycle at 72°C for 1 minute), then purified with AmpureXP beads (Beckman Coulter, A63881). The library quality was validated on a 2200 TapeStation from Agilent Technologies (Agilent, Santa Clara, CA). Concentrations of the libraries were determined using a Kapa Library Quantification Kit (KAPA Biosystems, KK4933) and loaded on cBOT (Illumina) at final concentration of 1.5nM for cluster generation, then sequenced with 50bp single-read on a HiSeq3000 sequencer (Illumina).

### ChIPseq data analysis

**Mapping:** Sequenced DNA reads were mapped to mouse genome mm10 using bowtie (version 1.1.2) ([Langmead et al., 2009](#)) with at most 2 mismatches allowed and only the reads that were mapped to unique position were retained. 34-47 million reads were generated per sample. 90-94% reads were mapped to mouse genome, with 73-84% uniquely mapped. To avoid PCR bias, for multiple reads that were mapped to the same genomic position, only one copy was retained for further analysis. 19-29 million reads were used in the final analyses.

**Peak Calling:** H3K9ac peaks were detected by MACS (version 1.4.2) ([Zhang et al., 2008](#)). The window size was set as 500 bp and the p-value cutoff was 1e-5. H3K9ac peaks were initially called by comparing to the corresponding total H3. Then the peaks that overlapped ENCODE blacklisted regions ([Consortium, 2012](#)) or were not called by comparing to the corresponding total input were removed.

**Differential Peak Calling:** The peaks of all H3K9ac samples were merged and the numbers of reads in these merged peaks were counted for each H3K9ac sample. The count table was used to call differential H3K9ac peaks between *Gcn5<sup>fx/fx</sup>* and *Gcn5<sup>-/-</sup>* by edgeR ([Robinson et al., 2010](#)). Batch effect among the 4 replicates was corrected following edgeR user's guide. Peaks with FDR (false discovery rate) ≤ 0.05 were called as changed between *Gcn5<sup>fx/fx</sup>* and *Gcn5<sup>-/-</sup>*. Genes with differential peaks in promoter (defined as -1000 bp to +500bp from TSS) were called as associated with changed H3K9ac.

**Signal Landscape:** Each read was extended by 150bp to its 3' end. The number of reads on each genomic position was rescaled to normalize the effective library size by edgeR to 10M and averaged over every 10bp window. The normalized values were displayed in UCSC genome browser ([Kent et al., 2002](#)).

**Transcription Factor Binding:** ENCODE ChIP-Seq Significance Tool ([Auerbach et al., 2013](#)) was used to identify enriched ENCODE transcription factors in the promoters of the genes associated with changed H3K9ac. The promoter was defined as -5000 bp to +2000 bp from TSS.

### **RNaseq data analysis**

Mapping: The reads were mapped to mouse genome (mm10) by TopHat (version 2.0.10) ([Kim et al., 2013](#)) with an overall mapping rate of 84-94%. 72-91% fragments have both ends mapped to mouse genome.

Differential Expression: The number of fragments in each known gene from GENCODE Release M8 ([Mudge and Harrow, 2015](#)) was enumerated using htseq-count from HTSeq package (version 0.6.0) ([Anders et al., 2015](#)). Genes with less than 10 fragments in all the samples were removed before differential expression analysis. The differential expression between conditions was statistically assessed by R/Bioconductor package DESeq ([Anders and Huber, 2010](#)) (version 1.16.0). Genes with FDR (false discovery rate)  $\leq 0.05$ , fold change  $\geq 2$  and length  $> 200$ bp were called as differentially expressed.

Principle Component Analysis (PCA): PCA was performed by R function pcomp using cpm (count of fragments in each gene per million of fragments mapped to all exons) values. The scale option was set as TRUE.

Heatmap: The normalized counts from DESeq were used to generate heatmap by Cluster 3.0 ([de Hoon et al., 2004](#)) and Java Treeview ([Saldanha, 2004](#)). The values in each gene were centered by median and rescaled so that the sum of the squares of the values is 1.0.

Gene Function and Pathway Analysis: The differential genes called by DESeq were used for Ingenuity Pathway Analysis (IPA) and Gene Set Enrichment Analysis (GSEA) ([Subramanian et al., 2005](#)).

### **Monolayer differentiation of mESCs**

Early mesoderm and endoderm lineages were generated following the protocols of Villegas et al., 2013 and ([Orlova et al., 2014](#)) with some modifications for mESCs. Briefly, mESCs were cultured on Col-IV coated plates for 2 days in differentiation media supplemented with B27, N2 and ROCK inhibitor (2.5 $\mu$ M). At day 2 the medium was replaced with MEDF (DMEM-High glucose (HyClone™, SH3002201) medium supplemented with 2% (v/v) FBS (Gibco™, 10437-028), 0.1mM non-essential amino acids (Corning™, MT25025CI), 2mM L-glutamine (Hyclone, SH3003401), 1% (v/v) penicillin/streptomycin (Hyclone, SV30010), 0.1 mM  $\beta$ -mercaptoethanol (BME) (Fisher, 03446I-100), and 1mM sodium pyruvate (Gibco™, 11360070)) for 24 hours, then supplemented with Activin A (50ng/mL) for two additional days to induce differentiation towards early mesoderm and endoderm lineages.

### Antibodies used in this study

| Antibodies                              | Manufacturers             | Catalog No. | Applications      |
|-----------------------------------------|---------------------------|-------------|-------------------|
| Anti-phospho-ERK                        | Cell Signaling Technology | 4370        | Westerns          |
| Anti-ERK                                | Cell Signaling Technology | 4695        | Westerns          |
| Anti-phospho-AKT                        | Cell Signaling Technology | 4060        | Westerns          |
| Anti-AKT                                | Cell Signaling Technology | 4691        | Westerns          |
| Anti-phospho-p38                        | Cell Signaling Technology | 4511        | Westerns          |
| Anti-p38                                | Cell Signaling Technology | 9212        | Westerns          |
| Anti-phospho-c-RAF (S259)               | Cell Signaling Technology | 9421        | Westerns          |
| Anti-c-RAF                              | Cell Signaling Technology | 53745       | Westerns          |
| Anti-FGFR1                              | Cell Signaling Technology | 9740        | Westerns          |
| Anti-cMYC                               | Cell Signaling Technology | 9402        | Westerns/ChIP     |
| Anti-H3                                 | Abcam                     | ab1791      | ChIP              |
| Anti-H3K9ac                             | Millipore                 | 07-352      | ChIP              |
| Anti-Rabbit IgG                         | Millipore                 | 12-370      | ChIP              |
| Anti-SOX1                               | BD Biosciences            | 560749      | IF/Mass Cytometry |
| Anti-GATA4                              | Abcam                     | ab84593     | IF                |
| Anti-Laminin                            | Millipore                 | AB2034      | IF                |
| Anti-Vimentin                           | Abcam                     | ab92547     | IF                |
| Alexa Fluor 568 Phalloidin              | ThermoFisher Scientific   | A12380      | IF                |
| Donkey anti-rabbit IgG Alexa Fluor® 488 | ThermoFisher Scientific   | A21206      | IF                |
| Donkey anti-rabbit IgG Alexa Fluor® 555 | ThermoFisher Scientific   | A31572      | IF                |
| Donkey anti-rabbit IgG Alexa Fluor® 647 | ThermoFisher Scientific   | A31573      | IF                |
| Donkey anti-mouse IgG Alexa Fluor® 488  | ThermoFisher Scientific   | A21202      | IF                |
| Goat Anti-mouse IgG Alexa Fluor® 568    | ThermoFisher Scientific   | A11004      | IF                |
| Donkey anti-mouse IgG Alexa Fluor® 647  | ThermoFisher Scientific   | A31571      | IF                |
| Anti-NANOG                              | Cell Signaling Technology | 3580        | Mass Cytometry    |
| Anti-OCT4                               | Santa Cruz                | sc-5279     | Mass Cytometry    |
| Anti-SOX2                               | R&D Systems               | MAB2018     | Mass Cytometry    |
| Anti-GATA6                              | R&D Systems               | AF1700      | Mass Cytometry    |
| Anti-PAX3                               | R&D Systems               | MAB2457     | Mass Cytometry    |
| Anti-PAX6                               | R&D Systems               | AF8510      | Mass Cytometry    |
| Anti-BRACHYURY                          | R&D Systems               | AF2085      | Mass Cytometry    |
| Anti-HAND1                              | R&D Systems               | AF3168      | Mass Cytometry    |
| Anti-FOXA2                              | BD Biosciences            | 561580      | Mass Cytometry    |
| Anti-GATA4                              | BD Biosciences            | 560327      | Mass Cytometry    |
| Anti-SOX17                              | BD Biosciences            | 561590      | Mass Cytometry    |

### Primers used in this study

| Oligo name                    | Sequences (5'-3')      | Source                                |
|-------------------------------|------------------------|---------------------------------------|
| <b>qRT-PCR (RNA analysis)</b> |                        |                                       |
| Cdh2 fwd                      | CAGGGTGGACGTCATTGTAG   | <a href="#">(Kamiya et al., 2011)</a> |
| Cdh2 rev                      | AGGGTCTCCACCACTGATTC   |                                       |
| Fgf3 fwd                      | ACAGGCGGGAAGCATATGTA   | Originally designed                   |
| Fgf3 rev                      | GGCCATGAACAAGAGAGGAC   |                                       |
| Fgf4 fwd                      | CGTTGTAGTTGTTGGGCAGA   | Originally designed                   |
| Fgf4 rev                      | TTCTTCGTGGCTATGAGCAG   |                                       |
| Fgf5 fwd                      | GCGATCCACAGAACTGAAAA   | <a href="#">(Kamiya et al., 2011)</a> |
| Fgf5 rev                      | ACTGCTTGAACCTGGGTAGG   |                                       |
| Foxa2 fwd                     | GAGCAGCAACATCACCACAG   | Originally designed                   |
| Foxa2 rev                     | CGTAGGCCTTGAGGTCCAT    |                                       |
| Gata6 fwd                     | CAAAAGCTTGCTCCGGTAAC   | <a href="#">(Kamiya et al., 2011)</a> |
| Gata6 rev                     | TGAGGTGGTCGCTTGTGTAG   |                                       |
| Grb10 fwd                     | ATCTCCGTTTCCCATTTCC    | Originally designed                   |
| Grb10 rev                     | CTCCTTACCTCCTCCTCCGA   |                                       |
| Otx2 fwd                      | CTTCATGAGGGAAGAGGTGG   | Originally designed                   |
| Otx2 rev                      | GGCCTCACTTTGTTCTGACC   |                                       |
| Pbgd fwd                      | CAGGGTACAAGGCTTTCAGC   | Originally designed                   |
| Pbgd rev                      | CGGAGTCATGTCCGGTAAC    |                                       |
| Prcka fwd                     | AACGAATCATGGCACCTCT    | Originally designed                   |
| Prcka rev                     | CACTGCACCGACTTCATCTG   |                                       |
| Sox1 fwd                      | CCTCGGATCTCTGGTCAAGT   | <a href="#">(Kamiya et al., 2011)</a> |
| Sox1 rev                      | GCAGGTACATGCTGATCATCTC |                                       |
| Spry4 fwd                     | AGGTCCTGAACTGCACCAAG   | Originally designed                   |
| Spry4 rev                     | GGGGATTTACACAGACGTGG   |                                       |
| Stat3 fwd                     | CTGCTCCAGGTAGCGTGTGT   | Originally designed                   |
| Stat3 rev                     | CTCAGCCCCGGAGACAGT     |                                       |
| T fwd                         | CTGGGAGCTCAGTTCTTTTCG  | <a href="#">(Kamiya et al., 2011)</a> |
| T rev                         | CCCCTTCATACATCGGAGAA   |                                       |
| <b>ChIP-qPCR</b>              |                        |                                       |
| Beat1 fwd                     | GGGTGCAAATGTGAGTCTCC   | Originally designed                   |
| Beat1 rev                     | GCCCAGCTCTCCATCTTCC    |                                       |
| Rps6ka2 fwd                   | CCTCACCGAGAGGAGGAAG    | Originally designed                   |
| Rps6ka2 rev                   | CCCTGCAACTCCTTGCTTAT   |                                       |
| Mthfd2 fwd                    | AAGCGTCCGCATCTCCAC     | Originally designed                   |
| Mthfd2 rev                    | TATCCTTCCAAGCATCACC    |                                       |
| Intergenic fwd                | AAGGGCCTCTGCTTAAAAA    | Originally designed                   |
| Intergenic rev                | AGAGCTCCATGGCAGGTAGA   |                                       |

### References

Anders, S., and Huber, W. (2010). Differential expression analysis for sequence count data. *Genome Biol* 11, R106.

Anders, S., Pyl, P.T., and Huber, W. (2015). HTSeq--a Python framework to work with high-throughput sequencing data. *Bioinformatics* *31*, 166-169.

Auerbach, R.K., Chen, B., and Butte, A.J. (2013). Relating genes to function: identifying enriched transcription factors using the ENCODE ChIP-Seq significance tool. *Bioinformatics* *29*, 1922-1924.

Consortium, E.P. (2012). An integrated encyclopedia of DNA elements in the human genome. *Nature* *489*, 57-74.

de Hoon, M.J., Imoto, S., Nolan, J., and Miyano, S. (2004). Open source clustering software. *Bioinformatics* *20*, 1453-1454.

Kamiya, D., Banno, S., Sasai, N., Ohgushi, M., Inomata, H., Watanabe, K., Kawada, M., Yakura, R., Kiyonari, H., Nakao, K., *et al.* (2011). Intrinsic transition of embryonic stem-cell differentiation into neural progenitors. *Nature* *470*, 503-509.

Kent, W.J., Sugnet, C.W., Furey, T.S., Roskin, K.M., Pringle, T.H., Zahler, A.M., and Haussler, D. (2002). The human genome browser at UCSC. *Genome Res* *12*, 996-1006.

Kim, D., Pertea, G., Trapnell, C., Pimentel, H., Kelley, R., and Salzberg, S.L. (2013). TopHat2: accurate alignment of transcriptomes in the presence of insertions, deletions and gene fusions. *Genome Biol* *14*, R36.

Langmead, B., Trapnell, C., Pop, M., and Salzberg, S.L. (2009). Ultrafast and memory-efficient alignment of short DNA sequences to the human genome. *Genome Biol* *10*, R25.

Mudge, J.M., and Harrow, J. (2015). Creating reference gene annotation for the mouse C57BL6/J genome assembly. *Mamm Genome* *26*, 366-378.

Orlova, V.V., van den Hil, F.E., Petrus-Reurer, S., Drabsch, Y., Ten Dijke, P., and Mummery, C.L. (2014). Generation, expansion and functional analysis of endothelial cells and pericytes derived from human pluripotent stem cells. *Nat Protoc* *9*, 1514-1531.

Robinson, M.D., McCarthy, D.J., and Smyth, G.K. (2010). edgeR: a Bioconductor package for differential expression analysis of digital gene expression data. *Bioinformatics* *26*, 139-140.

Saldanha, A.J. (2004). Java Treeview--extensible visualization of microarray data. *Bioinformatics* *20*, 3246-3248.

Subramanian, A., Tamayo, P., Mootha, V.K., Mukherjee, S., Ebert, B.L., Gillette, M.A., Paulovich, A., Pomeroy, S.L., Golub, T.R., Lander, E.S., *et al.* (2005). Gene set enrichment analysis: a knowledge-based approach for interpreting genome-wide expression profiles. *Proc Natl Acad Sci U S A* *102*, 15545-15550.

Zhang, Y., Liu, T., Meyer, C.A., Eeckhoute, J., Johnson, D.S., Bernstein, B.E., Nusbaum, C., Myers, R.M., Brown, M., Li, W., *et al.* (2008). Model-based analysis of ChIP-Seq (MACS). *Genome Biol* *9*, R137.
